# Supplementary material for: Generation of strong, homochiral bases by electrochemical reduction of phenazine derivativesElectronic supplementary information (ESI) available: procedure for conversion of 7 into 9 using electrochemical reduction of 6a to generate the chiral base; crystallographic data for (pS)-4, 5b, 6a and 6b. See http://www.rsc.org/suppdata/cc/b3/b313995f/
Source: Royal Society of Chemistry journal article supplement (doi:10.1039/b313995f), 2004-01-01
Supplement: b313995f.doc [file b313995f.doc]

**Procedure for conversion of epoxide 7 into ester 9 using an electrogenerated base derived from the probase 6a**

An electrochemical cell, the anode and cathode compartments of which were divided by sintered glass, was equipped with a mercury pool as the cathode, a carbon rod as the anode and a silver wire as the reference electrode. Phenazine derivative **6a** (15.4 mg, 3.76  10-5 mol), 3,4-epoxy-2,3,4,5-tetrahydrothiphene 1,1-dioxide (**7**) (10 mg, 7.52  10-5 mol), and 2,4,6-trimethylbenzoic anhydride (35mg, 1.12  10–4 mol) were dissolved in a 0.1M solution of tetrabutylammonium hexafluorophosphate in DMSO (7 ml) in the cathode compartment under nitrogen. The anode compartment contained a 0.1M solution of tetrabutylammonium hexafluorophosphate in DMSO (9 ml).

A potential of –1.5 V was applied and 2.2 F passed through the solution.

The solutions in the cathode and the anode were diluted with water and extracted twice with ether. The ether layer was dried with MgSO4 and then the solvent was evaporated under vacuum. The crude mixture was separated by flash chromatography (CH2Cl2) yielding the ester **9** as a mixture of two enantiomers.

Chiral HPLC [Daicel Chiralpak OT(+) 0.46  5 cm precolumn and 0.46  25 cm column, hexane:propan-2-ol (9:1), T = 5 °C, peak detection by absorbance at 261 nm]: *t*R 26.1 min [minor (*S*)- product] and 29.1 min [major (*R*)- product].

UV spectrum (MeOH): max 261 ( 533) and 278 ( 488).

1H-NMR (270 MHz, CDCl3): 6.83-6.87 (4H, m, Ar + CH=); 6.12-6.17 (1H, m, O-CH); 3.83 (1H, dd, *J*=14.1, 7.7Hz, CH2); 3.31 (1H, dd, *J*= 14.1, 3.3 Hz, CH2); 2.30 (9H, s, CH3).

13C-NMR (67.5 MHz, CDCl3): 169.69, 140.95, 136.37, 136.13, 135.93, 129.03, 128.70, 69.56, 54.32, 21.38 and 20.03.

Mass spectrum (FAB): Found *m/z* 303.0650 (M++Na). C14H16NaS requires 303.0667.
